# Supplementary material for: Ice-Template Crosslinked PVA Aerogels Modified with Tannic Acid and Sodium Alginate
Source: MDPI journal article supplement (doi:10.3390/gels8070419), 2022-07-05
Supplement: s1 [file s1]

## Supplementary material

**Table S1.** Aerogel compositions.

| Sample | PVA |           | TA |           | SA |           | NaOH  |           |
|--------|-----|-----------|----|-----------|----|-----------|-------|-----------|
|        | g   | (% total) | g  | (% total) | g  | (% total) | g*    | (% total) |
| P5     | 5   | 100       | 0  | 0         | 0  | 0         | 0     | 0         |
| P5T2A1 | 5   | 58        | 2  | 23        | 1  | 12        | 0.587 | 7         |
| P5T2A2 | 5   | 52        | 2  | 21        | 2  | 21        | 0.587 | 6         |
| P5T2A3 | 5   | 47        | 2  | 19        | 3  | 28        | 0.587 | 6         |
| P5T3A1 | 5   | 51        | 3  | 30        | 1  | 10        | 0.881 | 9         |
| P5T3A2 | 5   | 46        | 3  | 28        | 2  | 18        | 0.881 | 8         |
| P5T3A3 | 5   | 42        | 3  | 25        | 3  | 25        | 0.881 | 7         |

\*Grams required for reaching pH 8.5

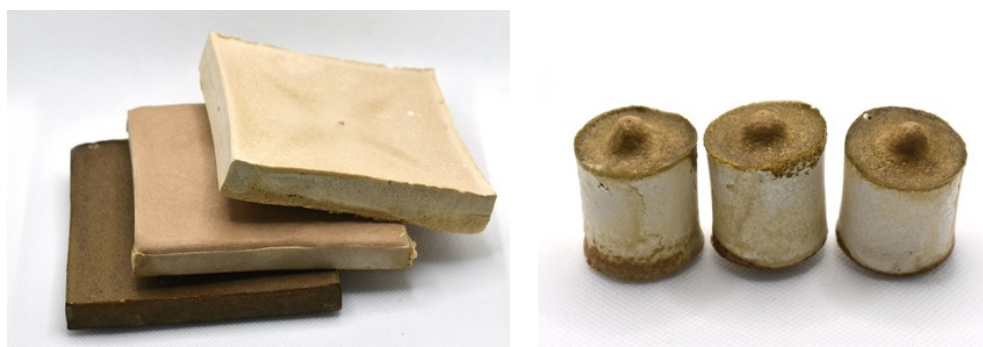

**Figure S1.** Aerogel monoliths for (a) Fire testing and (b) the rest of the characterizations.

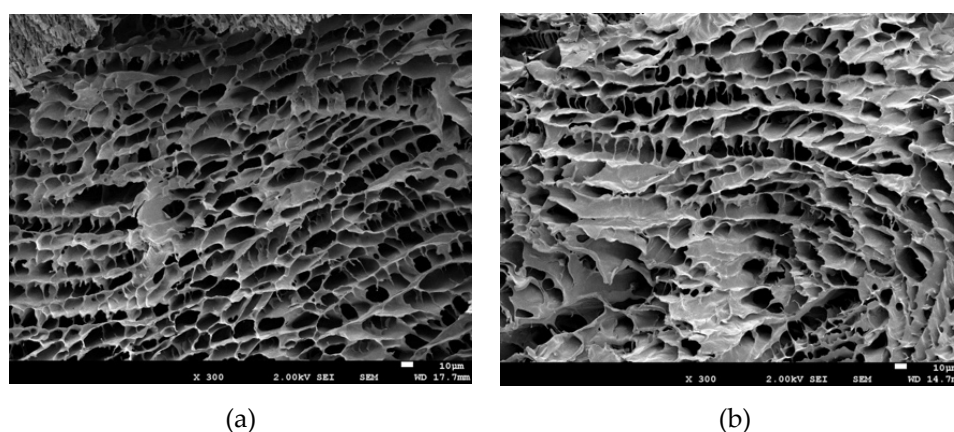

**Figure S2.** TA effect on the microstructure of (a) P5T2A3 Vs. (b) P5T3A3 aerogels.

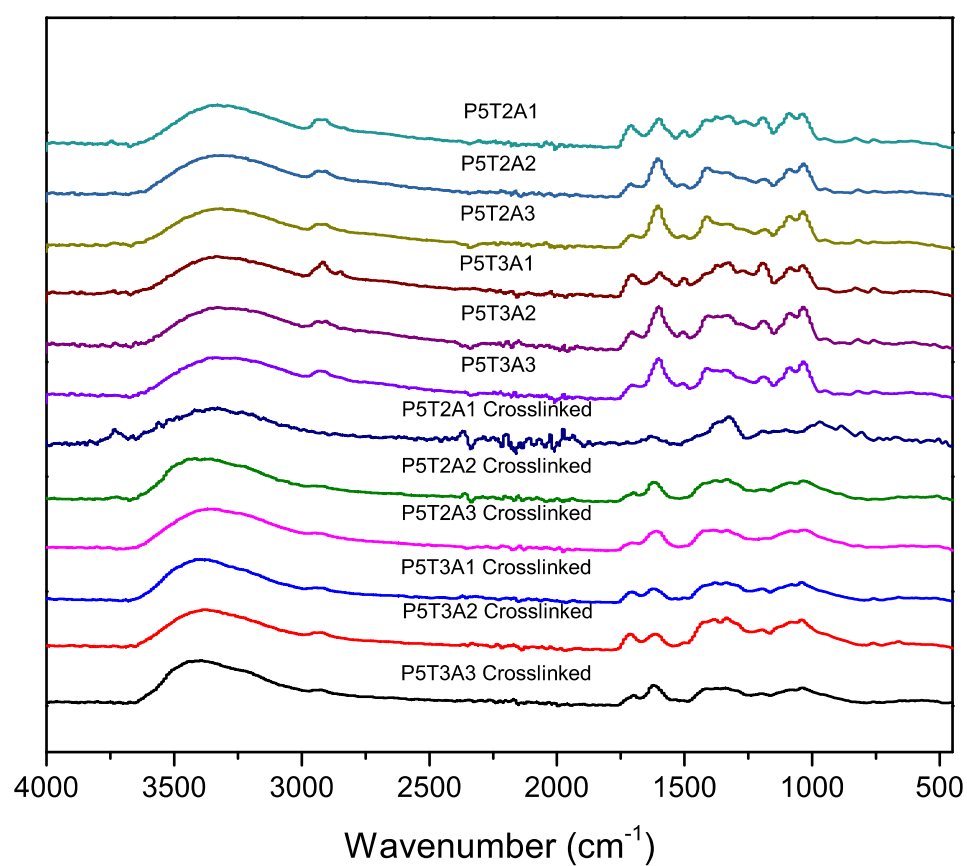

Figure S3. FTIR comparison of all the aerogels compositions.

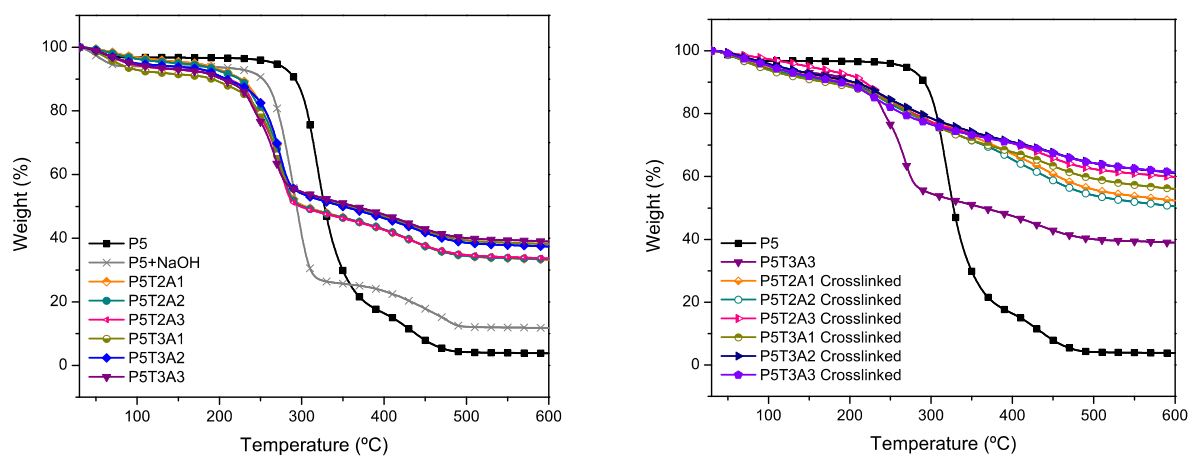

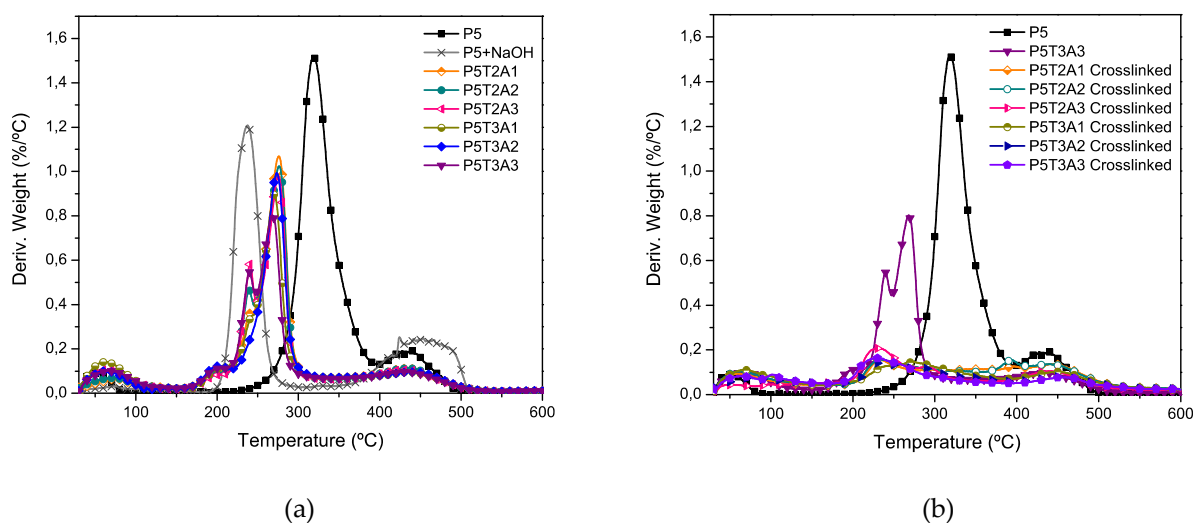

**Figure S4.** Thermal degradation behavior of (a) uncrosslinked and (b) crosslinked aerogels.

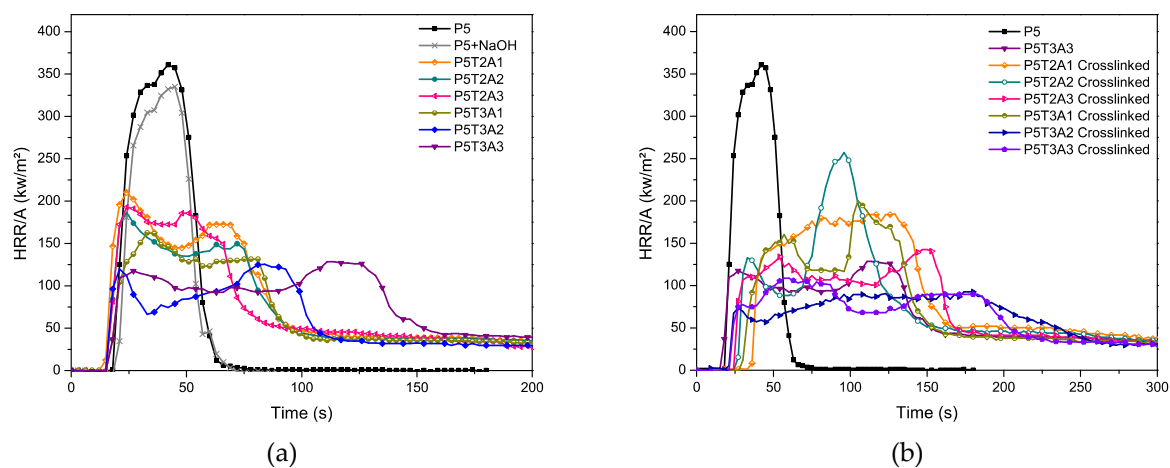

**Figure S5.** HRR curves of (a) uncrosslinked and (b) crosslinked PVA/TA/SA aerogels.

Videos S1 to S4 can be found in the following link: <https://doi.org/10.5281/zenodo.6699900>

Video S1: P5 aerogel during vertical burning; Video S2: P5T3A3 uncrosslinked aerogel during vertical burning; Video S3 and S4: Self-extinguished performance of P5T3A3 crosslinked aerogel (parts 1 and 2, respectively).
